# Supplementary material for: Electrochemical behavior of inorganic–organic hybrid polyoxometalate ((Cys)3[PW12O40]) nanostructure self-assembled monolayer on polycrystalline gold electrode surfaces
Source: Royal Society of Chemistry journal article supplement (doi:10.1039/c8nj05721d), 2018-12-06
Supplement: c8nj05721d1.pdf [file c8nj05721d1.pdf]

## Supporting Information

**Table 1S.** FT-IR data ( $\bar{\nu}/\text{cm}^{-1}$ ) of HPW, Cys and (Cys)PW

| Compound | $\bar{\nu}(\text{COO}^-)$ | $\bar{\nu}(\text{CH}_2)$ | $\bar{\nu}(\text{C-O})$ | $\bar{\nu}(\text{C-N})$ | $\bar{\nu}(\text{P-O}_a)$ | $\bar{\nu}(\text{W-O}_d)$ | $\bar{\nu}(\text{W-O}_b\text{-W})$ | $\bar{\nu}(\text{W-O}_c\text{-W})$ |
|----------|---------------------------|--------------------------|-------------------------|-------------------------|---------------------------|---------------------------|------------------------------------|------------------------------------|
| HPW      | -                         | -                        | -                       | -                       | 1079                      | 972                       | 887                                | 753                                |
| Cys      | 1740, 1512                | 1432, 1400               | 1218                    | 1138                    | -                         | -                         | -                                  | -                                  |
| (Cys)PW  | 1731, 1510                | 1470                     | 1251                    | 1137                    | 1073                      | 967                       | 883                                | 750                                |

O<sub>a</sub> Central oxygen  
 O<sub>b</sub>, O<sub>c</sub> Bridging oxygen  
 O<sub>d</sub> Terminal oxygen

**Table 2S.** Electrochemical parameters extracted from CVs (Fig. 2B) on bare poly Au and poly Au SAM- modified electrodes in the presence of  $[\text{Fe}(\text{CN})_6]^{3-/4-}$  (0.5 mM) in PBS (0.11 M, pH 3).

| Electrode            | $i_{p,a}$ ( $\mu\text{A}$ ) | $\Delta E_p$ (mV) |
|----------------------|-----------------------------|-------------------|
| Bare poly Au         | 6.42±0.11                   | 63±5              |
| poly Au- Cys SAM     | 5.79±0.06                   | 88±10             |
| poly Au- HPW SAM     | 2.31±0.18                   | 127±8             |
| poly Au- (Cys)PW SAM | 8.24±0.24                   | 61±4              |
